# Supplementary material
Source: PubMed Central journal article supplement (PMC6175032)
Supplement: gly076_suppl_supplementary_table_s1.pdf [file gly076_suppl_supplementary_table_s1.pdf]

**Supplementary Table 1.** Original Enrollment Goals by Clinical Site

| Clinical Site                          | Practices | Goal Per Practice | Total Goal |
|----------------------------------------|-----------|-------------------|------------|
| Essentia Health                        | 8         | 75                | 600        |
| HealthCare Partners <sup>a</sup>       | 8         | 75                | 600        |
| Johns Hopkins Medicine                 | 11        | 60                | 660        |
| Mercy Health Network, U Iowa           | 8         | 75                | 600        |
| Michigan Medicine, U Michigan          | 5         | 81                | 405        |
| Mount Sinai Health System <sup>a</sup> | 9         | 60                | 540        |
| Partners HealthCare                    | 12        | 60                | 720        |
| Reliant Medical Group                  | 8         | 75                | 600        |
| U Pittsburgh Medical Center            | 8         | 75                | 600        |
| U Texas Medical Branch <sup>a</sup>    | 9         | 75                | 675        |
| Overall                                | 86        | 70 <sup>b</sup>   | 6,000      |

<sup>a</sup>These sites were selected, in part, because their patient populations included relatively high representation of Hispanics and Blacks.

<sup>b</sup>Represents a calculated average across the 10 clinical sites.
